# Supplementary material for: Thermal spin-crossover with a large hysteresis spanning room temperature in a mononuclear complex
Source: Royal Society of Chemistry journal article supplement (doi:10.1039/c7cc01806a), 2017-01-01

## Single-crystal to single-crystal thermal spin-crossover with a large hysteresis spanning room temperature†

E. Tailleur, M. Marchivie, N. Daro, G. Chastanet and P. Guionneau

ESI

**ESI-1.** Squid measurements for a polycrystalline assembly of  $[\text{Fe}(\text{PM-PEA})_2(\text{NCSe})_2]$  at various speed and for subsequent thermal cycles. No significant effects is noted.

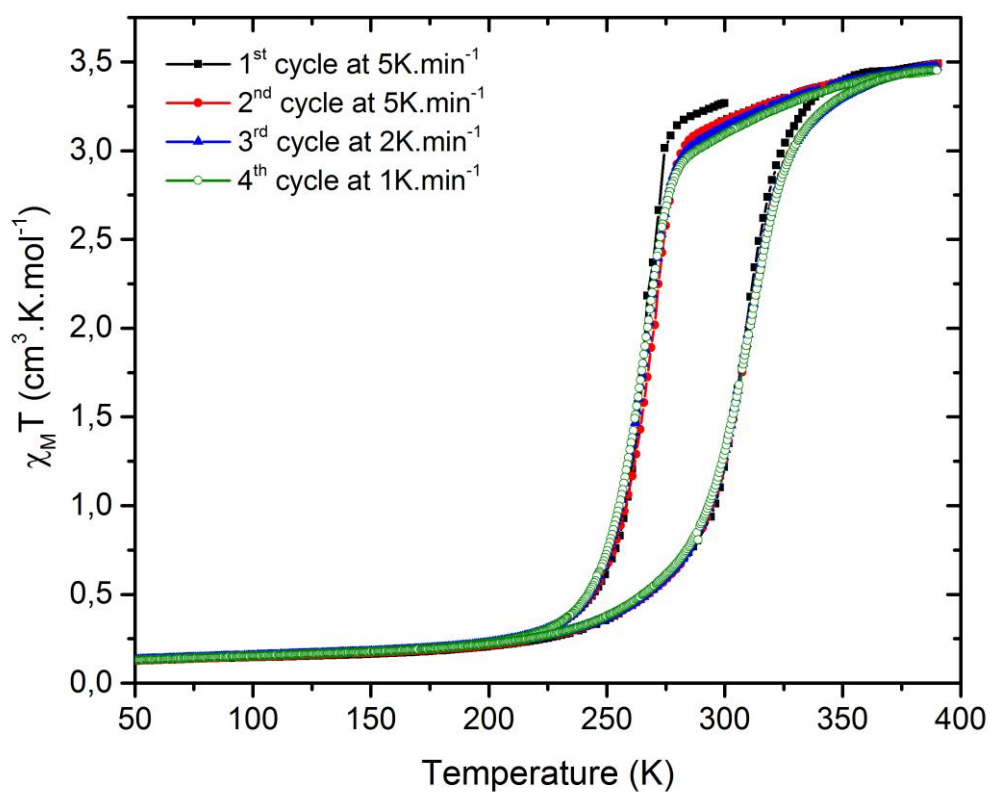

**ESI-2.** Figure showing the powder X-Ray diffraction experimental pattern (black) and the simulated diffraction pattern from single-crystal XRD data (red) as well as their difference (blue). Allowed Bragg peaks positions from the single-crystal unit-cell and symmetry (green). This superposition demonstrates that powder and single-crystal are isostructural.

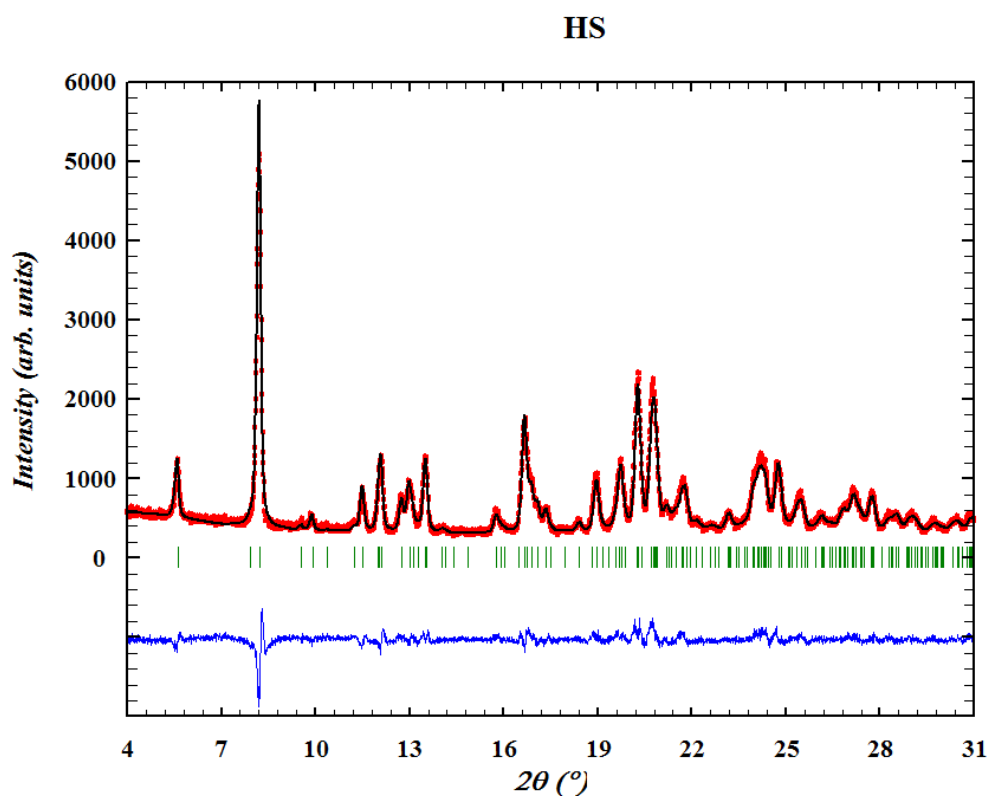

ESI-3. Squid measurements on one single-crystal for  $[\text{Fe}(\text{PM-PEA})_2(\text{NCSe})_2]$ .

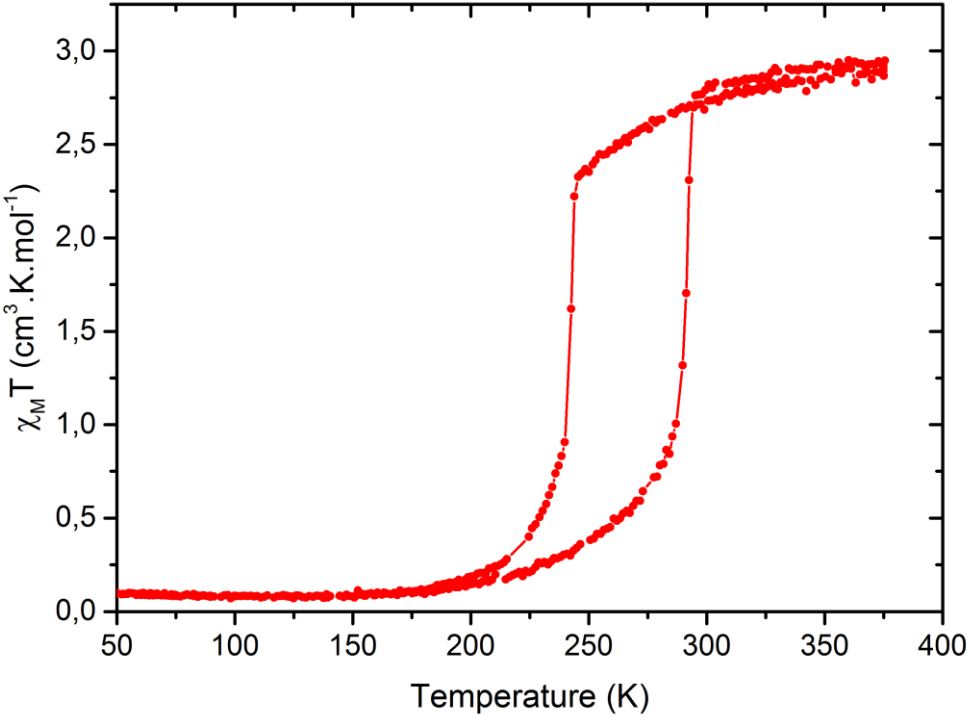

Supplement: c7cc01806a1.pdf [file c7cc01806a1.pdf]
